# Supplementary material for: Oxidation and reduction performance of 1,1,1-trichloroethane in aqueous solution by means of a combination of persulfate and zero-valent iron
Source: Royal Society of Chemistry journal article supplement (doi:10.1039/c5ra07655b), 2015-01-01
Supplement: c5ra07655b1.pdf [file c5ra07655b1.pdf]

## Supplementary Information

### **Oxidation and reduction performance of 1,1,1-trichloroethane in aqueous solution by means of a combination of persulfate and zero-valent iron**

Xiaogang Gu<sup>a,b</sup>, Shuguang Lu<sup>a\*</sup>, Xuhong Guo<sup>b</sup>, Jingke Sima<sup>c</sup>, Zhaofu Qiu<sup>a</sup>, Qian Sui<sup>a</sup>

<sup>a</sup> State Environmental Protection Key Laboratory of Environmental Risk Assessment and Control on Chemical Process, Shanghai Key Laboratory of Functional Materials Chemistry, East China University of Science and Technology, Shanghai 200237, China

<sup>b</sup> State Key Laboratory of Chemical Engineering, East China University of Science and Technology, Shanghai 200237, China

<sup>c</sup> School of Environmental Science and Engineering, Shanghai Jiao Tong University, Shanghai 200240, China

\* Corresponding author: Tel: +86 021 64250709, fax: +86 021 64252737, e-mail: [lvshuguang@ecust.edu.cn](mailto:lvshuguang@ecust.edu.cn)

## **Lists of captions:**

**Text S1** Analytical methods for TCA and the intermediates.

**Fig. S1** Schematic diagram of the head-to-bottom rotation drum.

**Fig. S2** TCA Control tests for volatilization, persulfate and  $\text{Fe}^{2+}$  alone after 12 h (Conditions:  $[\text{TCA}]_0 = 0.15 \text{ mM}$ ,  $[\text{persulfate}]_0 = 9.0 \text{ mM}$ ,  $[\text{Fe}^{2+}]_0 = 8.9 \text{ mM}$ ; Note: the pH values of 2.5, 5, 7 were chosen as the pH during persulfate-ZVI system varied from 2.8 to 5.9).

**Fig. S3** Comparison of TCA degradation performance between persulfate- $\text{Fe}^{2+}$  and persulfate-ZVI system (Conditions:  $[\text{TCA}]_0 = 0.15 \text{ mM}$ ,  $[\text{Fe}^{2+}]_0 = 8.9 \text{ mM}$ ,  $[\text{ZVI}]_0 = 0.05 \text{ g}$ ,  $[\text{persulfate}]_0 = 9.0 \text{ mM}$ ,  $20 \text{ }^\circ\text{C}$ ).

**Fig. S4** The solution pH variation in the persulfate-ZVI system (Conditions:  $[\text{TCA}]_0 = 0.15 \text{ mM}$ ,  $[\text{persulfate}]_0 = 9.0 \text{ mM}$ ,  $[\text{ZVI}]_0 = 0.05 \text{ g}$ ,  $20 \text{ }^\circ\text{C}$ ).

**Fig. S5** Effect of  $\text{Fe}^{2+}$  on TCA degradation in the presence of ZVI alone (Conditions:  $[\text{TCA}]_0 = 0.15 \text{ mM}$ ,  $[\text{Fe}^{2+}]_0 = 8.9 \text{ mM}$ ,  $[\text{ZVI}]_0 = 0.05 \text{ g}$ ,  $20 \text{ }^\circ\text{C}$ ).

**Text S1** Analytical methods for TCA and the intermediates.

**(1) Operating conditions for TCA analysis by a GC**

| Parameters       | Conditions                          |
|------------------|-------------------------------------|
| Injection port   | 240 °C, split ratio: 20/1           |
| Capillary column | DB–VRX, 60 m × 320 μm i.d. × 1.4-μm |
| Oven             | Isothermal at 75 °C                 |
| Carrier gas      | Nitrogen (>99.999%), 5 mL/min       |
| Detector         | Electron capture detector, 260 °C   |

**(2) Operating conditions for the volatile intermediates by an automatic purge and trap (P&T) coupled to a GC/MS**

1 mL of aqueous sample was removed into a 42 mL volatile organic analysis (VOA) vial, and then the vial was fully filled by water for analysis.

|                  | Parameters             | Conditions                                               |
|------------------|------------------------|----------------------------------------------------------|
| P&T conditions   | Sample volume          | 5 mL                                                     |
|                  | Gas flow               | 40 mL min <sup>-1</sup>                                  |
|                  | Purge cycle            | 11 min at ambient temperature                            |
|                  | Desorb cycle           | 4 min at 180 °C                                          |
|                  | Bake cycle             | 210 °C                                                   |
| GC/MS conditions | Injection port         | 230 °C, split ratio: 15/1                                |
|                  | Carrier gas            | Helium, 1.2 mL/min                                       |
|                  | Capillary column       | DB–VRX, 60 m×320 μm i.d.×1.4-μm                          |
|                  | Oven program           | 40 °C (2min)<br>250 °C at 20 °C min <sup>-1</sup> (3min) |
|                  | Interface temperature  | 200 °C                                                   |
|                  | Ion source temperature | 250 °C                                                   |
|                  | Mass range             | TIM mode, <i>m/z</i> : 35-275                            |

### (3) GC/MS conditions for the carboxylic acid intermediates

| Parameters             | Conditions                                                                                          |
|------------------------|-----------------------------------------------------------------------------------------------------|
| Injection port         | 200 °C, split ratio: 5/1                                                                            |
| Solvent delay          | 8 min                                                                                               |
| Capillary column       | DB-VRX, 60 m × 320 μm i.d. × 1.4-μm                                                                 |
| Carrier gas            | Helium, 1.5 mL/min                                                                                  |
| Oven program           | 35 °C (10min)<br>65 °C at 2 °C min <sup>-1</sup> (5min)<br>280 °C at 20 °C min <sup>-1</sup> (3min) |
| Interface temperature  | 200 °C                                                                                              |
| Ion source temperature | 250 °C                                                                                              |
| Mass range             | TIM mode, <i>m/z</i> : 35-150                                                                       |

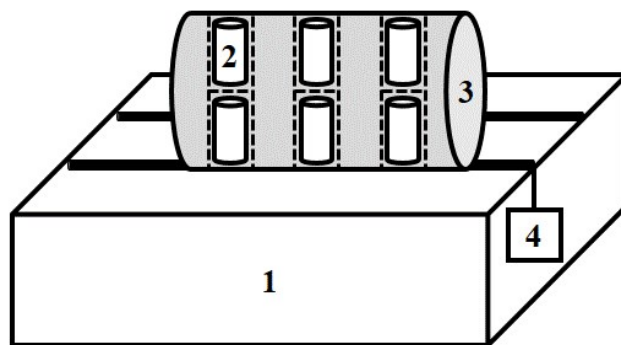

**Fig. S1** Schematic diagram of the head-to-bottom rotation drum.

(1) Holder, (2) reaction vial (fixed by compartments), (3) the rotation drum, (4) motor.

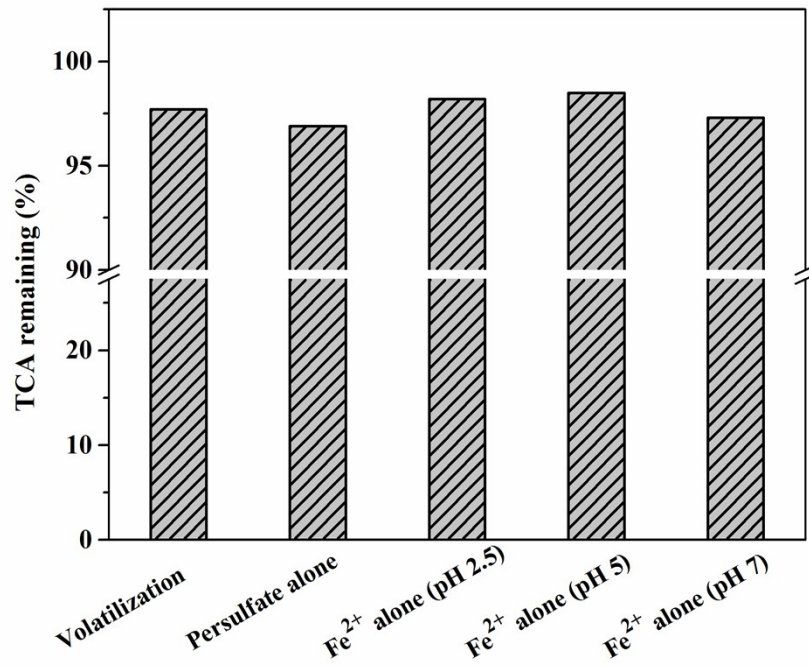

**Fig. S2** TCA Control tests for volatilization, persulfate and Fe<sup>2+</sup> alone after 12 h ([TCA]<sub>0</sub> = 0.15 mM, [persulfate]<sub>0</sub> = 9.0 mM, [Fe<sup>2+</sup>]<sub>0</sub> = 8.9 mM; Note: the pH values of 2.5, 5, 7 were chosen as the pH variation during persulfate-ZVI system was from 2.8 to 5.9)

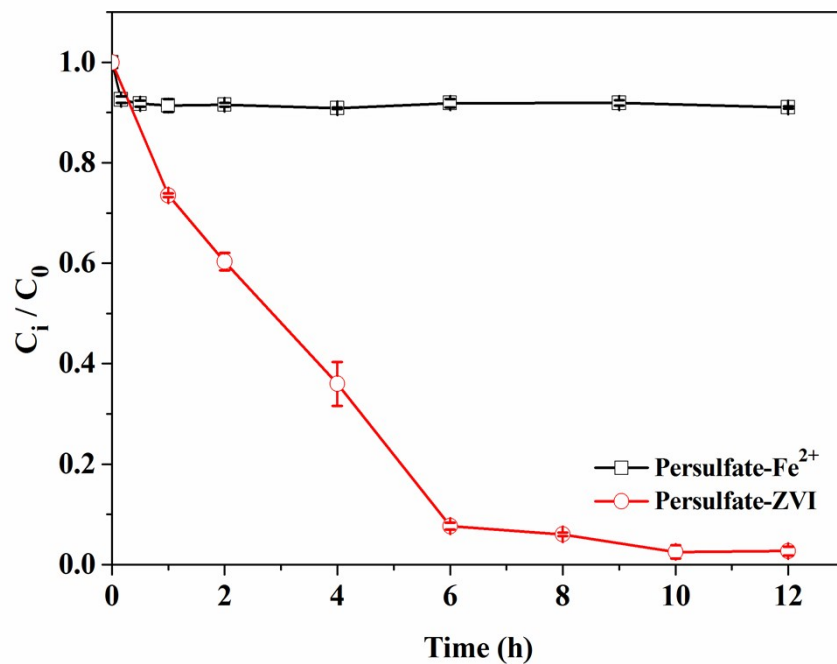

**Fig. S3** Comparison of TCA degradation performance between persulfate- $Fe^{2+}$  and persulfate-ZVI system (Conditions:  $[TCA]_0 = 0.15$  mM,  $[Fe^{2+}]_0 = 500$  mg  $L^{-1}$ ,  $[ZVI]_0 = 0.05$  g,  $[persulfate]_0 = 9.0$  mM, 20 °C).

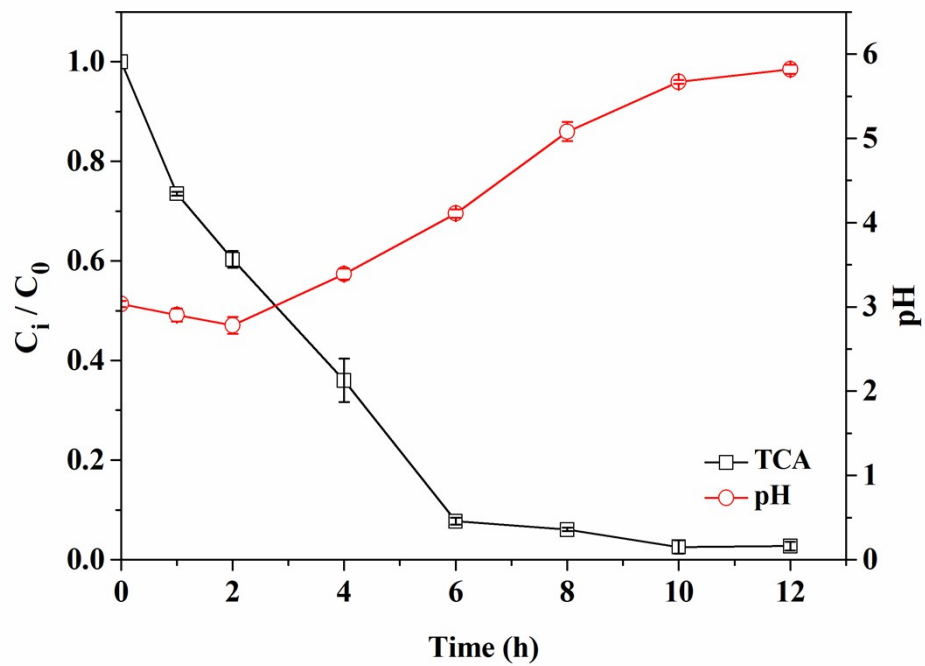

**Fig. S4** The solution pH variation in the persulfate-ZVI system (Conditions:  $[TCA]_0 = 0.15$  mM,  $[persulfate]_0 = 9.0$  mM,  $[ZVI]_0 = 0.05$  g,  $20$  °C).



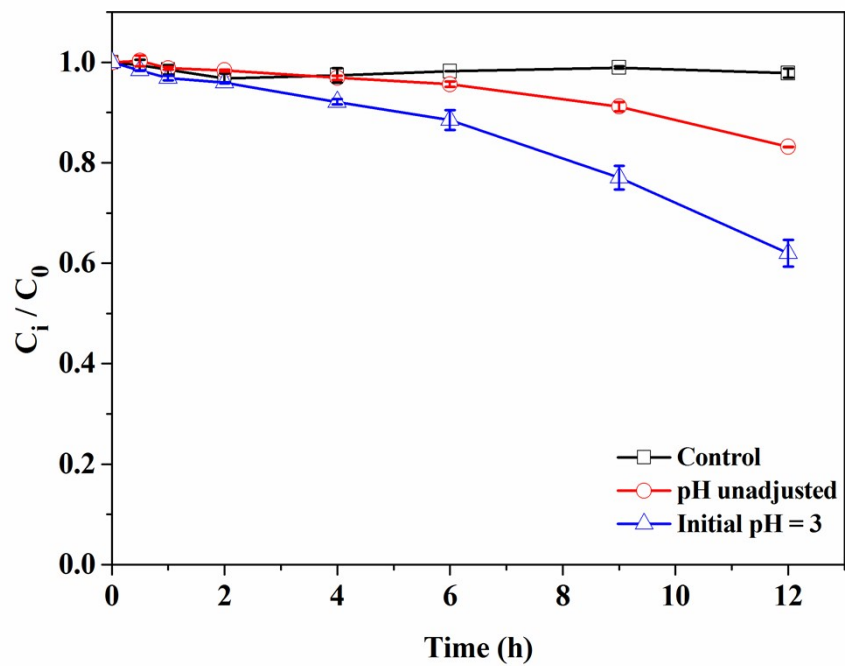

**Fig. S5** Effect of  $\text{Fe}^{2+}$  on TCA degradation in the presence of ZVI alone (Conditions:  $[\text{TCA}]_0 = 0.15 \text{ mM}$ ,  $[\text{Fe}^{2+}]_0 = 500 \text{ mg L}^{-1}$ ,  $[\text{ZVI}]_0 = 0.05 \text{ g}$ ,  $20 \text{ }^\circ\text{C}$ ).
